# Supplementary material
Source: publisher site journal article supplement (https://www.dovepress.com/article/464634)
Supplement: Supplementary file 1 [file get_supplementary_file.php]

**Supplemental Content**

Appendix 1. Overview of “Outside the Frame”

| **Session** | **Aims and Objectives** | **Activities** | **Discussion Questions** |
| --- | --- | --- | --- |
| 1 | Introduce students to the concept of uncertainty tolerance as a buildable skill  Engage with ambiguity in visual art and discuss its implications  Familiarize students with the VTS process of grounding interpretations in evidence  Encourage inquiry and perspective-taking over achieving a single “right” outcome | Participants were guided through three separate Visual Thinking Strategy (VTS) modules. For the first artwork, students were provided no context or background information in discussing the piece; for the second and third artworks, students first engaged in a VTS-based discussion before a facilitating museum educator periodically and briefly provided context to encourage further inquiry about the work. For example, that a piece was entitled “Crossing Waters” and had been inspired by the transatlantic slave trade (see Figure 2). | How might this new information and context influence, reinforce, or complicate your previous understanding of the piece?  How does the perspective we hear from others influence our own interpretations? |
| 2 | Further hone an open-ended approach to describing art, making narrative inferences, and communicating interpretations  Cultivate receptivity and curiosity in response to topics initially perceived as uncomfortable or difficult  Use art as a reflective trigger to promote sharing of vulnerability and fostering community among learners | Students first gathered in a portraiture exhibit for a VTS session, where they generated non-contextual interpretations about the piece. They then partook an in an explicitly historical discussion about the work, which depicted Native American leaders and delegates advocating in America for the preservation of their homelands (see Figure 1).  Personal response tour exercise(Gaufberg & Williams, 2011), in which students were instructed to individually locate a piece in the museum that inspired some discomfort or internal resistance. Once identified, participants spent several minutes with their piece before reconvening with the group for a tour of selected objects and to share the thoughts and feelings they stimulated. | VTS activity and discussion:  How does this piece speak to your own self-perceptions and concerns as trainees in the clinical space?  What internal tensions might be generated by inhabiting a role of responsibility and advocacy as a trainee?  Personal response tour:  What drew you to (or away) from the piece?  What was it like to sit in introspection with the discomfort of this piece? |
| 3 | Appreciate the role deep listening can play in tolerating uncertainty  Create a visual representation of a literary reading to learn about the importance of subjectivity in medicine | A faculty member from [Redacted] Department of Classics gave a dramatic oral reading of an excerpt from Homer’s *The Iliad.* The piece– describing the forging of Achilles’s shield for his battle with Hector– was read in the Greek wing of the museum, where students listened while synchronously sketching their own perceptions of what the shield might have looked like in reality. Students were then provided sheet metal, chisels, and other tools to engrave these designs and then share their completed “shield” with the group. | What do you notice about the range of interpretations of Homer’s excerpt evident in the completed “shields”?  How does our individual perception affect our powers of observation?  What similarities might Homer’s text hold with regards to the patient history?  Are there corelates in this activity to the act of medical interpretation? If so, how might this help us think about the act of narrativization and representation in the patient context? |
| 4 | Explore how the visual arts can increase awareness of conscious and unconscious bias  Engage with diverse cultural contexts to re-examine common representations of illness, health, and treatment | An art history professor and curator gave a lecture on shamanism in ancient indigenous art its role in healing, as well as contemporary clinical trials using psychedelics for a range of mental disorders. Students then walked through the ancient Americas art exhibit at the museum, accompanied by a museum educator, where they saw the specific pieces that had been discussed. Direct correlations were made between the ‘objective’, standardized medical content that students had learned in lecture settings and how these same pathologies or remedies are differently viewed or artistically depicted in other cultures. | What surprised you about the background of these artworks and artifacts? What do you notice now?  How might this change how we traditionally view disability and pathology? |

Appendix 2. Post-Course Open-Ended Survey Items

1. What did you like about this course?
2. What would you change?
3. Do you have any comments about the logistics of these last four sessions?

Appendix 3. Post-Course Narrative Evaluation Prompts

| The following is one of the listed learning objectives for this course:  *Develop metacognitive practices for planning, monitoring, and evaluating one’s approaches to unfamiliar or uncertain situations.*  How do you think this elective helped/did not help you achieve this goal? Feel free to draw from examples of class exercises, discussions, or artworks to support your answer. |
| --- |
| Over the course of this elective, we have had several collaborations with faculty from various departments/fields of study at [Redacted], as facilitators, guides, and lecturers. Please comment on how you believe these collaborations affected your experience of the course. |
